# Supplementary material for: Metformin Reduces NGF-Induced Tumour Promoter Effects in Epithelial Ovarian Cancer Cells
Source: PubMed Central journal article supplement (PMC7602813; doi:10.3390/ph13100315), 2020-10-16
Supplement: pharmaceuticals-13-00315-s001.pdf [file pharmaceuticals-13-00315-s001.pdf]

## Supplementary material

### Metformin reduces NGF-induced tumour promoter effects in Epithelial Ovarian Cancer cells

|                | Primers                                                                                                               | Application        | Amplicon                  | Sequence                |
|----------------|-----------------------------------------------------------------------------------------------------------------------|--------------------|---------------------------|-------------------------|
| Survivin       | Sense: 5'-CTG GCA GCC CTT TCT<br>CAA GGA-3'<br>Antisense: 5'-GCA ACC GGA CGA<br>ATG CTT TT-3                          | Real-time<br>PCR   | 225 pb                    | NM_001168.2             |
| $\beta$ -actin | Sense: 5'- TGGCAC CCA GCA CAA<br>TGA AGA -3'<br>Antisense: 5'- GAA GCA TTT GCG<br>GTG GAC GAT -3'                     | Real-time<br>PCR   | 166 bp                    | NM_001101.4             |
| VEGF           | Sense: 5'- AGG CCA GCA CAT<br>AGG AGA GA -3'<br>Antisense: 5'-ACC GCC TCG GCT<br>TGT CAC AT-3'                        | Traditional<br>PCR | 104, 236<br>and 315<br>bp | NM001025367,<br>8 and 9 |
| $\beta$ -actin | Sense: 5'-TGA CGG GGT CAC CCA<br>CAG TGT GCC CAT CTA-3'<br>Antisense: 5'-CTA GAA GCA TTG<br>CGG TGG ACG ATG GAG GG-3' | Traditional<br>PCR | 660 bp                    | NM_001101.4             |

**Supplementary Table 1:** Primers sequence using to traditional and real time PCR. VEGF: vascular endothelial growth factor. Bp: base pair.

|                             | Primers                                              | PCR program<br>T° and time              |
|-----------------------------|------------------------------------------------------|-----------------------------------------|
| miR-23b                     | miR-23b_2 miScript Primer Assay (MS00031647, Qiagen) | 94°C 15 sec                             |
| miR-145                     | miR-145_1 miScript Primer Assay (MS00003528, Qiagen) | 55°C 30 sec<br>70°C 30 sec<br>40 cycles |
| U6 small nuclear RNA (RNU6) | RNU6 miScript Primer Assay (MS00033740, Qiagen)      |                                         |

**Supplementary Table 2:** Primers and PCR program employed for miR detection.

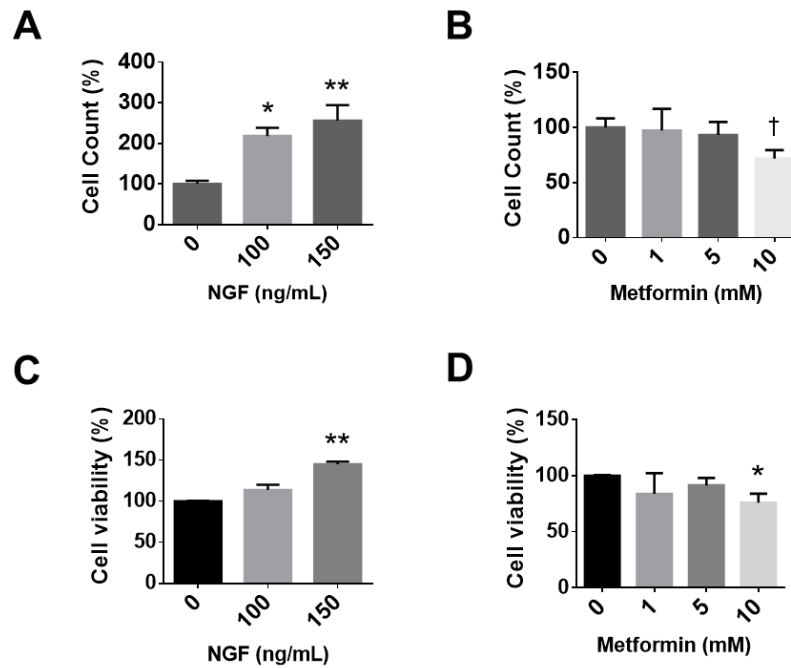

**Supplementary Figure 1. Effect of NGF and metformin on the cell count and viability of SKOV3 cells.** SKOV3 cells were incubated with NGF (0, 100 and 150 ng/mL) and metformin (0, 1, 5 and 10 mM) for 48 h and then cells were counted (**A**, **B**) and cell viability tests were performed (**C**, **D**). N=4 in triplicate. \*= $p < 0.05$  and \*\*= $p < 0.01$  with respect to the basal condition (Kruskal Wallis test and Dunn`s post-test). †= $p < 0.05$  with respect to basal condition using the Mann Whitney test. Results are expressed as the mean  $\pm$  standard error of the mean (SEM).

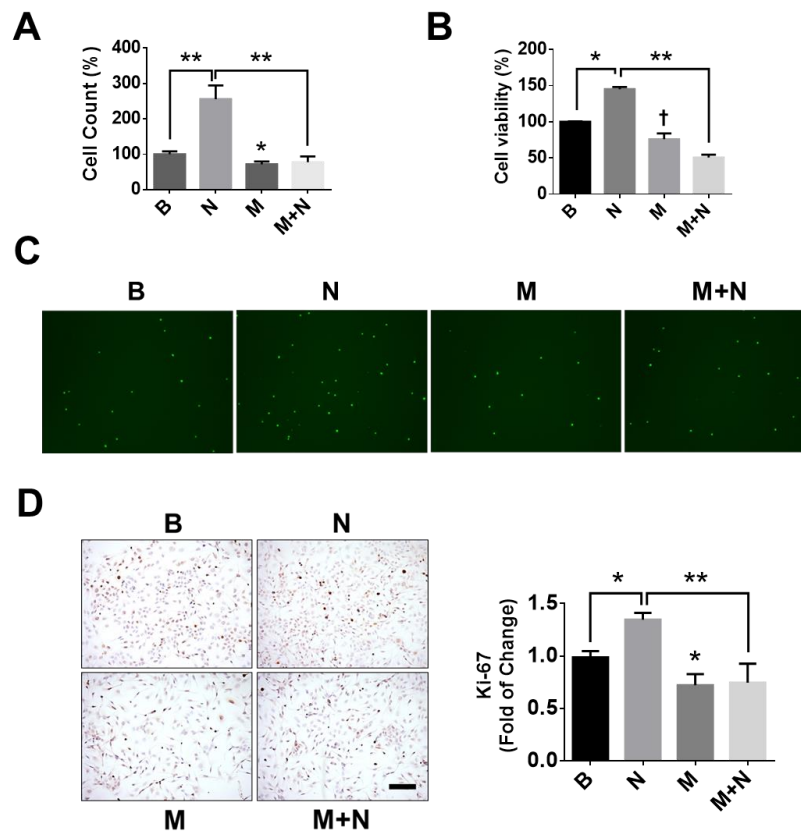

**Supplementary Figure 2. Metformin prevents the NGF-induced proliferation of SKOV3 cells.**

(A, B) Cells were stimulated with metformin (10 mM) and NGF (150 ng/mL) for 48 h to evaluate cell number and cell viability. N=4 in triplicate. (C) Representative images of SKOV3 cells after treatments (stain: acridine orange that identifies only viable cells). (D) SKOV3 cells were treated with metformin for 48 h in the absence or presence of NGF for the last 6 h. Then cells were stained for presence of the ki-67 proliferation marker. Bar= 100  $\mu$ m. N=4 (8 images per experiment were evaluated). \*= $p$ <0.05 and \*\*= $p$ <0.01 with respect to the basal condition or as indicated (Kruskal Wallis test and Dunn's post-test). †= $p$ <0.05 respect to basal condition using the Mann Whitney test. Results are expressed as the mean  $\pm$  standard error of the mean (SEM).

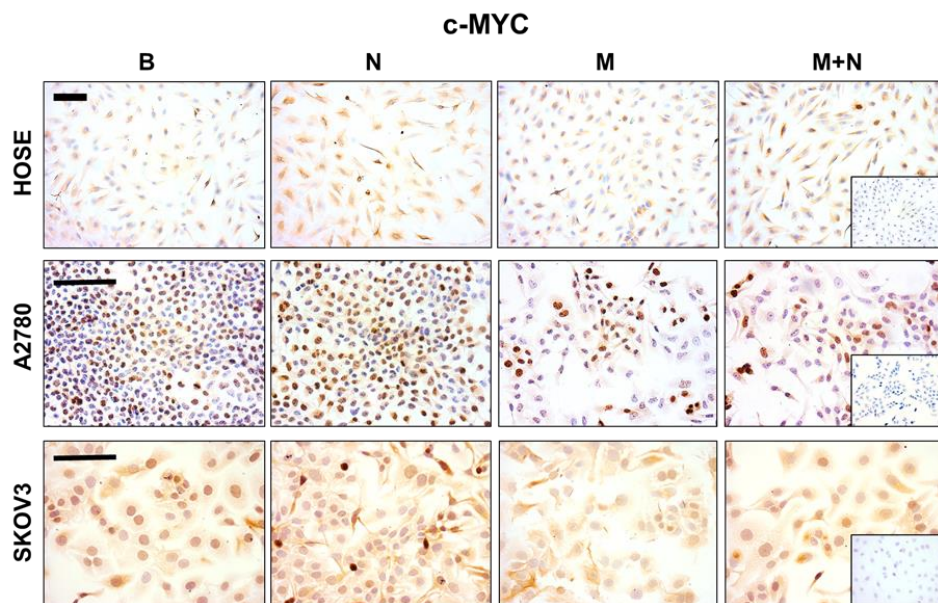

**Supplementary Figure 3. Representative images of c-MYC immunodetection in ovarian cells.**

Cells were stimulated with metformin (M, 10 mM, 48 h) and/or NGF (N, 100 or 150 ng/mL last 2 h) and c-MYC immunocytochemistry was performed in HOSE, A2780 and SKOV3 cells. B: baseline condition (without stimuli). Bar=100  $\mu$ m. Right lower insert: negative control (cells without primary antibody).

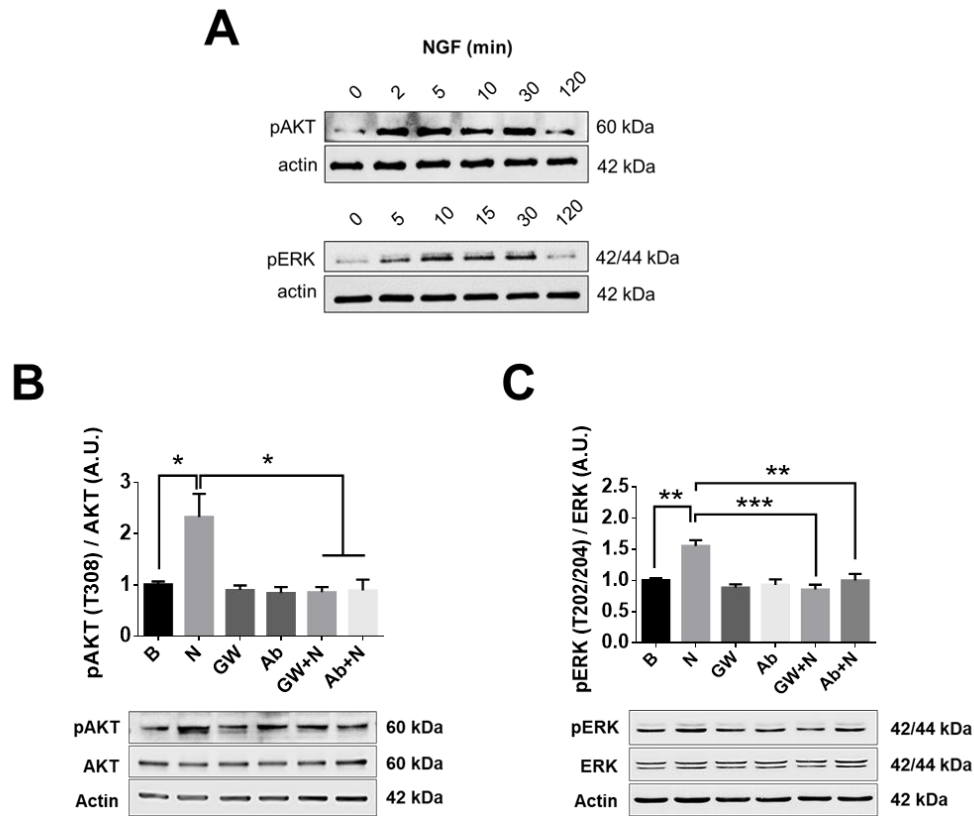

**Supplementary Figure 4. NGF activates AKT and ERK signalling pathways in a TRKA dependent manner.** **A:** A2780 cells were stimulated with NGF for 0, 2, 5, 10, 15, 30 and 120 min. Phospho-AKT (pAKT, S473) and phospho-ERK (pERK, T202/T204) levels were determined by western blotting after separating total protein extracts (50 ug). **B, C:** A2780 cells were treated with the specific TRKA inhibitor GW441756 (GW, 20 nM, Tocris Bioscience, Bristol, UK) or a neutralizing antibody (Ab, 5 µg/ml, Abcam, Cambridge, UK) for 1 h and then for the last 5 min stimulated with NGF (N, 100 ng/mL). B: baseline condition (without stimuli). N=4 or more independent experiments. \*=p<0.05, \*\*=p<0.01 and \*\*\*=p<0.001 as indicated (Kruskal Wallis test and Dunn`s post-test). Results are expressed as the mean ± standard error of the mean (SEM).

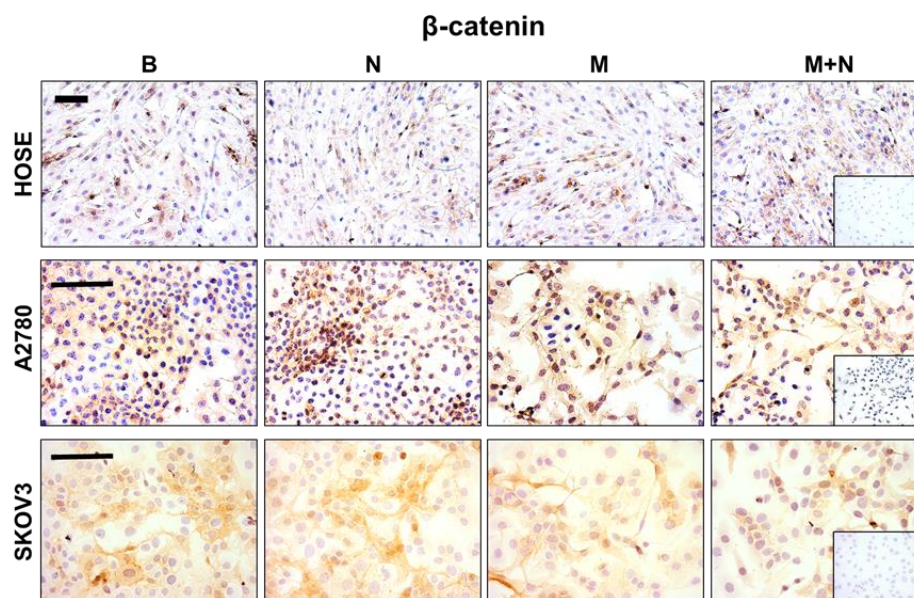

**Supplementary Figure 5. Representative images of  $\beta$ -catenin immunodetection in ovarian cells.**

Cells were treated with metformin (M, 10 mM, 48 h) and NGF (N, 150 ng/mL last 2 h) and  $\beta$ -catenin staining was determined in HOSE, A2780 and SKOV3 cells. B: baseline condition (without stimuli).

Bar= 100  $\mu$ m. Right lower insert: negative control (cells without primary antibody).

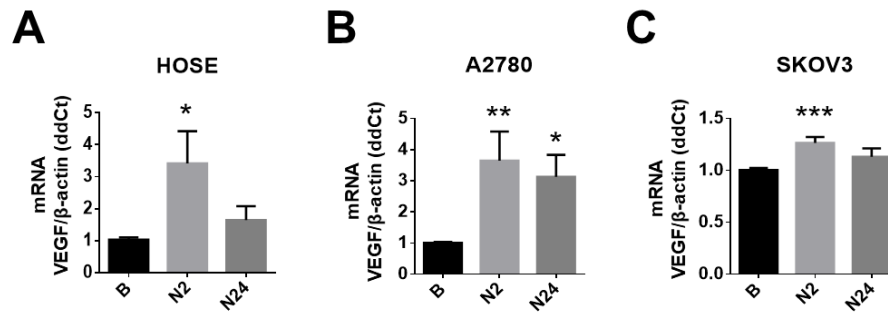

**Supplementary Figure 6. NGF increases survivin mRNA in ovarian cells.** HOSE (A), A2780 (B) and SKOV3 (C) cells were stimulated with NGF (100 or 150 ng/mL) for 2 (N2) or 24 h (N24) and survivin mRNA levels were determined by qPCR. B: baseline condition (without stimuli). N=4 or more experiments in duplicated. \*= $p < 0.05$  and \*\*= $p < 0.01$  with respect to the basal condition (Kruskal Wallis test and Dunn's post-test). Results are expressed as the mean  $\pm$  standard error of the mean (SEM).



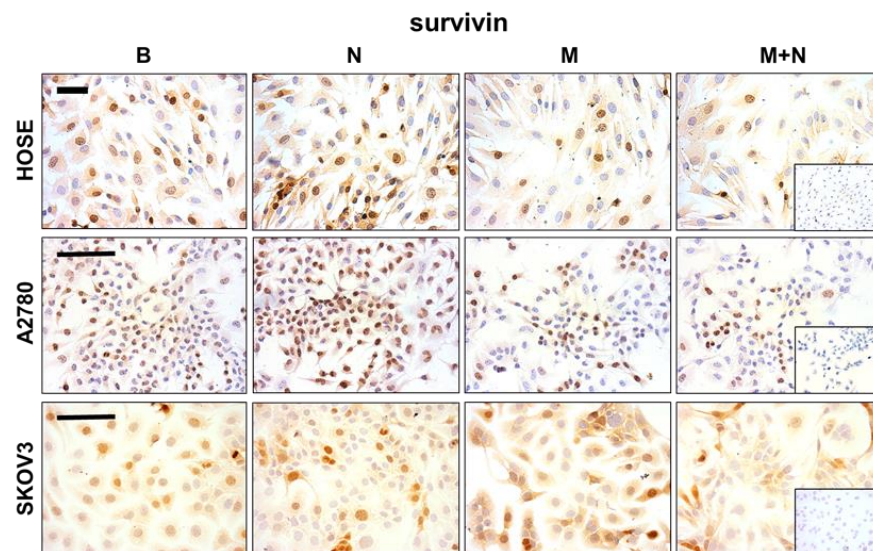

**Supplementary Figure 7. Representative images of survivin immunodetection in ovarian cells.**

Cells were stimulated with metformin (M, 10 mM, 48 h) and NGF (N, 150 ng/mL last 2h) and survivin staining was determined in HOSE, A2780 and SKOV3 cells. B: baseline condition (without stimuli).

Bar= 100  $\mu$ m. Right lower insert: negative control (cells without primary antibody).

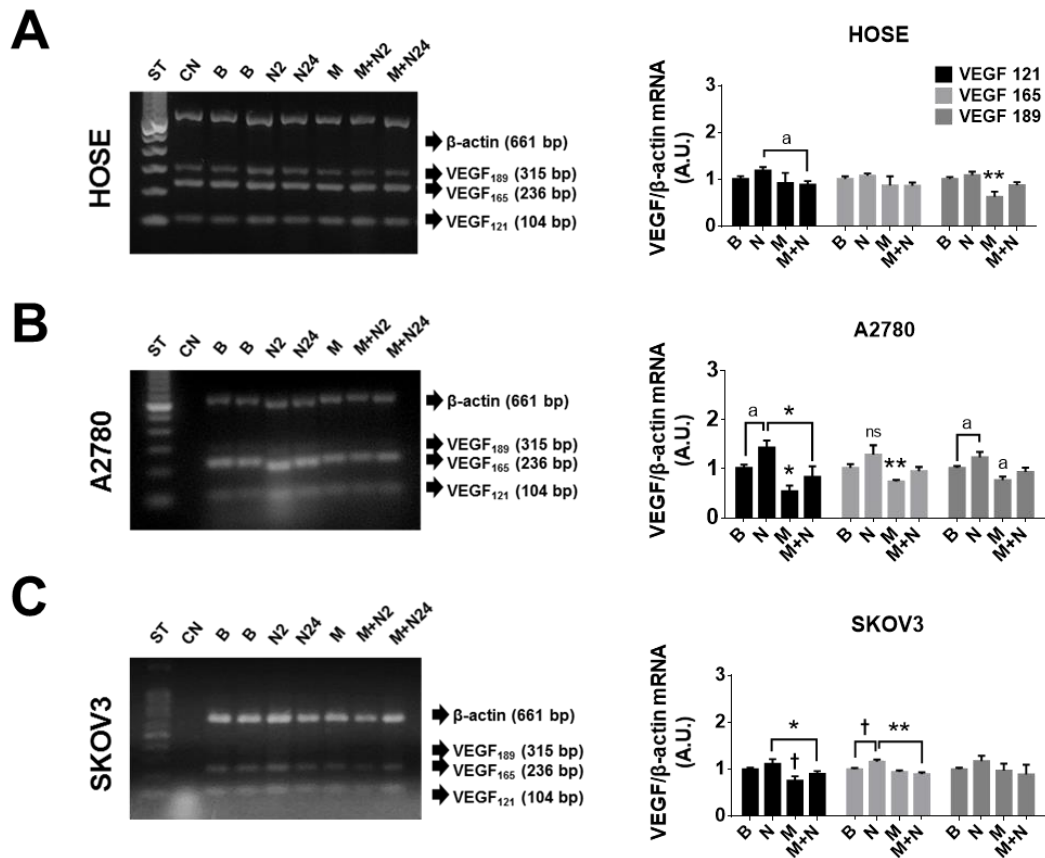

**Supplementary Figure 8. Effect of NGF and metformin on the mRNA levels of VEGF in ovarian cells.** Ovarian cells HOSE (A), A2780 (B) and SKOV3 (C) were stimulated with metformin (10 mM, 48 h) and NGF (150 ng/mL, the last 2 or 24 h) and the main three transcripts of VEGF (121, 165 and 189 aminoacids) were analysed by conventional PCR. B: baseline condition (without stimuli). N2: NGF for 2 h. N24: NGF for 24 h. M: metformin. The semi-quantification shown to the right corresponds to results obtained after 24 h of stimulation with NGF. N=4 independent experiments. \*= $p < 0.05$  and \*\*= $p < 0.01$  with respect to basal conditions or as indicated (Kruskal Wallis test and Dunn's post-test). †= $p < 0.05$  with respect to the basal conditions or as indicated using the Mann Whitney test. Results are expressed as the mean  $\pm$  standard error of the mean (SEM).

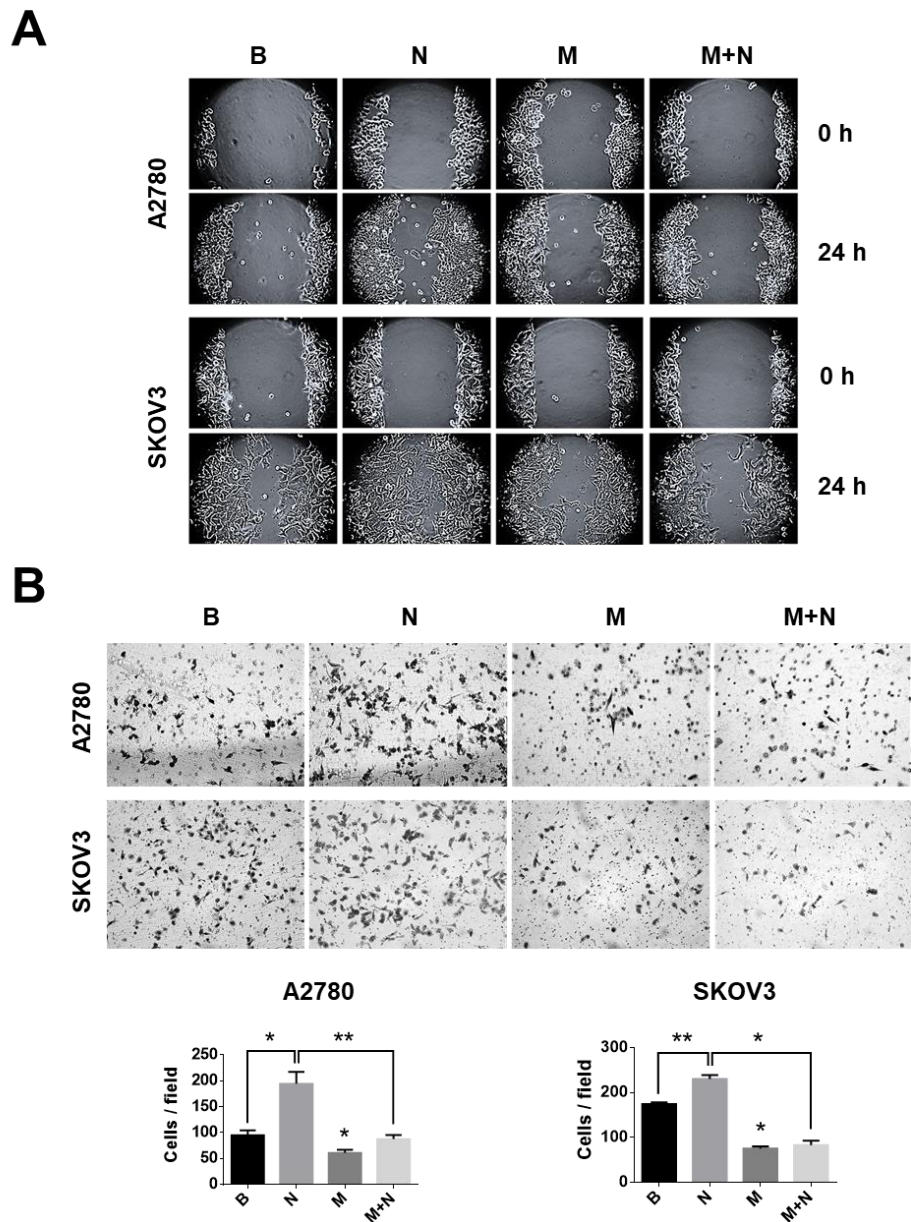

**Supplementary Figure 9. Metformin prevents the increase in migration and invasion stimulated by NGF in EOC cells.** (A) Wound healing assays performed with A2780 and SKOV3 cells stimulated with metformin (M, 10 mM) and NGF (N, 100 or 150 ng/ml). B: baseline condition (without stimuli). Ovarian cancer cells (500,000 per chamber) were serum-deprived for 24 h in 6-well plates. Wounds were introduced using a SPLScar™ Scratcher (SPL Life Sciences, Korea). Immediately thereafter, EOC cells were stimulated with NGF (100 or 150 ng/mL for 24 h) and/or metformin and photographed at 0 and 24 h after the stimulation. (B) Invasion assays performed with A2780 and SKOV3 cells using the indicated conditions \*= $p < 0.05$  and \*\*= $p < 0.01$  with respect to the basal condition (Kruskal Wallis test and Dunn's post-test). †= $p < 0.05$  with respect to the basal conditions or as indicated using the Mann Whitney test. Results are expressed as the mean  $\pm$  standard error of the mean (SEM).

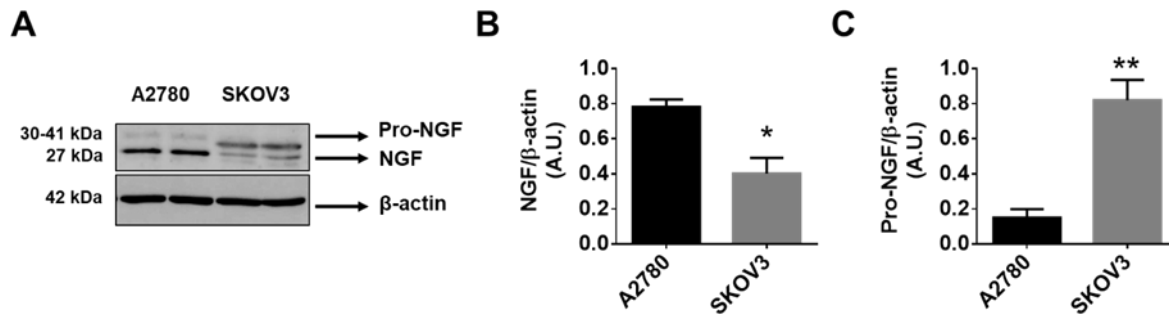

**Supplementary Figure 10. Immunodetection of NGF and Pro-NGF in EOC cells.** Protein extracts (50 ug) of A2780 and SKOV3 were used to determine NGF (A, B) and Pro-NGF (A, C) protein levels by western blotting with the primary rabbit polyclonal antibody ab6199 (Abcam, 1:500). N=4 (duplicate). \*= $p < 0.05$  and \*\*= $p < 0.01$  (Mann Whitney test).

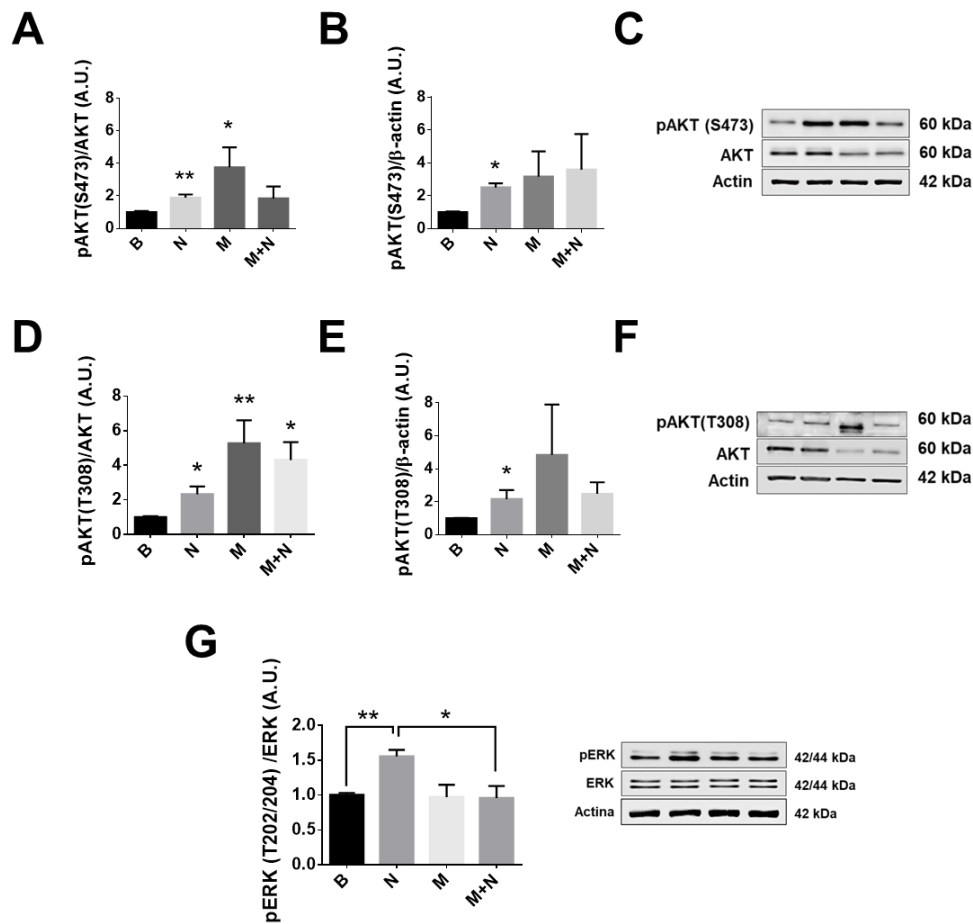

**Supplementary Figure 11. Metformin prevents ERK activation by NGF in EOC cells.** A2780 cells were treated with metformin (M, 10 mM, 48 h), NGF (N, 100 ng/mL, last 5 min) or no stimulus (B, basal condition). Then, cells were lysed and proteins (50 ug) were analysed by western blotting. (A-C) Representative western blot and the quantification of the bands by scanning densitometry to determine total AKT and phospho-AKT (S473) levels. (D-F) Representative western blot of total AKT and phospho-AKT (T308) and quantification by scanning densitometry. (G) Representative western blot and the quantification of bands by scanning densitometry for total ERK and phospho-ERK (T202/T204) in EOC cells. N=4 or more independent experiments. \*= $p < 0.05$ , \*\*= $p < 0.01$  and \*\*\*= $p < 0.001$  with respect to basal condition or as indicated (Kruskal Wallis test and Dunn's post-test). Results are expressed as the mean  $\pm$  standard error of the mean (SEM).
